# Supplementary material for: An Annual Blue Carbon Budget for Kelp Forests and Seagrass Beds
Source: Research Square preprint supplement (doi:10.21203/rs.3.rs-6473319/v1), 2025-05-22
Supplement: Supplementary file 1 [file e2ff50891d3fb6999100a3f4.xlsx]

## Sheet: Kelp Density
Date	Site	Latitude	Longitude	Quadrat_Number	Number_Saccharina_latissima	Number_Laminaria_digitata
20/6/2023	Sober_Island	44.832417°	-62.448700°	1	1	7
20/6/2023	Sober_Island	44.832417°	-62.448700°	2	1	8
20/6/2023	Sober_Island	44.832417°	-62.448700°	3	9	7
20/6/2023	Sober_Island	44.832417°	-62.448700°	1	6	7
20/6/2023	Sober_Island	44.832417°	-62.448700°	2	0	10
20/6/2023	Sober_Island	44.832417°	-62.448700°	3	20	5
20/6/2023	Sober_Island	44.832417°	-62.448700°	4	0	5
20/6/2023	Sober_Island	44.832417°	-62.448700°	5	4	5
2023-07-07	Broad_Cove	44.166372°	64.478754°	1	0	7
2023-07-07	Broad_Cove	44.166372°	64.478754°	2	1	8
2023-07-07	Broad_Cove	44.166372°	64.478754°	3	5	7
2023-07-07	Broad_Cove	44.166372°	64.478754°	4	0	2
2023-07-07	Broad_Cove	44.166372°	64.478754°	5	0	4
2023-07-07	Broad_Cove	44.166372°	64.478754°	6	0	1
2023-07-07	Broad_Cove	44.166372°	64.478754°	7	0	6
2023-07-07	Broad_Cove	44.166372°	64.478754°	8	0	3
20/7/2023	Sober_Island	44.832417°	-62.448700°	1	0	8
20/7/2023	Sober_Island	44.832417°	-62.448700°	2	2	5
20/7/2023	Sober_Island	44.832417°	-62.448700°	3	3	3
20/7/2023	Sober_Island	44.832417°	-62.448700°	4	0	13
20/7/2023	Sober_Island	44.832417°	-62.448700°	5	0	10
20/7/2023	Sober_Island	44.832417°	-62.448700°	6	0	5
20/7/2023	Sober_Island	44.832417°	-62.448700°	7	20	1
20/7/2023	Sober_Island	44.832417°	-62.448700°	8	3	6
28/7/2023	Broad_Cove	44.166372°	64.478754°	1	0	4
28/7/2023	Broad_Cove	44.166372°	64.478754°	2	0	1
28/7/2023	Broad_Cove	44.166372°	64.478754°	3	2	4
28/7/2023	Broad_Cove	44.166372°	64.478754°	4	0	3
28/7/2023	Broad_Cove	44.166372°	64.478754°	5	0	3
28/7/2023	Broad_Cove	44.166372°	64.478754°	6	0	4
17/08/2023	Sober_Island	44.832417°	-62.448700°	1	0	8
17/08/2023	Sober_Island	44.832417°	-62.448700°	2	0	2
17/08/2023	Sober_Island	44.832417°	-62.448700°	3	10	0
17/08/2023	Sober_Island	44.832417°	-62.448700°	4	0	7
17/08/2023	Sober_Island	44.832417°	-62.448700°	5	0	3
17/08/2023	Sober_Island	44.832417°	-62.448700°	6	0	4
17/08/2023	Sober_Island	44.832417°	-62.448700°	7	0	5
17/08/2023	Sober_Island	44.832417°	-62.448700°	8	6	0
29/08/2023	Broad_Cove	44.166372°	64.478754°	1	0	6
29/08/2023	Broad_Cove	44.166372°	64.478754°	2	0	2
29/08/2023	Broad_Cove	44.166372°	64.478754°	3	19	2
29/08/2023	Broad_Cove	44.166372°	64.478754°	4	0	1
29/08/2023	Broad_Cove	44.166372°	64.478754°	5	0	7
29/08/2023	Broad_Cove	44.166372°	64.478754°	6	0	3
22/09/2023	Sober_Island	44.832417°	-62.448700°	1	5	2
22/09/2023	Sober_Island	44.832417°	-62.448700°	2	0	7
22/09/2023	Sober_Island	44.832417°	-62.448700°	3	0	4
22/09/2023	Sober_Island	44.832417°	-62.448700°	4	0	3
22/09/2023	Sober_Island	44.832417°	-62.448700°	5	1	2
22/09/2023	Sober_Island	44.832417°	-62.448700°	6	0	3
22/09/2023	Sober_Island	44.832417°	-62.448700°	7	0	4
22/09/2023	Sober_Island	44.832417°	-62.448700°	8	0	3
28/09/2023	Broad_Cove	44.166372°	64.478754°	1	0	1
28/09/2023	Broad_Cove	44.166372°	64.478754°	2	0	2
28/09/2023	Broad_Cove	44.166372°	64.478754°	3	0	3
28/09/2023	Broad_Cove	44.166372°	64.478754°	4	0	2
28/09/2023	Broad_Cove	44.166372°	64.478754°	5	0	4
28/09/2023	Broad_Cove	44.166372°	64.478754°	6	0	3
24/10/2023	Broad_Cove	44.166372°	64.478754°	1	0	1
24/10/2023	Broad_Cove	44.166372°	64.478754°	2	0	3
24/10/2023	Broad_Cove	44.166372°	64.478754°	3	0	3
24/10/2023	Broad_Cove	44.166372°	64.478754°	4	0	3
27/10/2023	Sober_Island	44.832417°	-62.448700°	1	0	5
27/10/2023	Sober_Island	44.832417°	-62.448700°	2	0	3
27/10/2023	Sober_Island	44.832417°	-62.448700°	3	2	1
27/10/2023	Sober_Island	44.832417°	-62.448700°	4	0	3
27/10/2023	Sober_Island	44.832417°	-62.448700°	5	0	3
27/10/2023	Sober_Island	44.832417°	-62.448700°	6	0	2
2023-06-12	Sober_Island	44.832417°	-62.448700°	1	2	2
2023-06-12	Sober_Island	44.832417°	-62.448700°	2	0	3
2023-06-12	Sober_Island	44.832417°	-62.448700°	3	0	3
2023-06-12	Sober_Island	44.832417°	-62.448700°	4	0	2
2023-06-12	Sober_Island	44.832417°	-62.448700°	5	0	3
2023-06-12	Sober_Island	44.832417°	-62.448700°	6	3	2
2023-06-12	Sober_Island	44.832417°	-62.448700°	7	0	4
14/12/2023	Broad_Cove	44.166372°	64.478754°	1	0	1
14/12/2023	Broad_Cove	44.166372°	64.478754°	2	0	1
14/12/2023	Broad_Cove	44.166372°	64.478754°	3	0	2
14/12/2023	Broad_Cove	44.166372°	64.478754°	4	1	2
14/12/2023	Broad_Cove	44.166372°	64.478754°	5	0	3
14/12/2023	Broad_Cove	44.166372°	64.478754°	6	0	2
14/12/2023	Broad_Cove	44.166372°	64.478754°	7	1	2
14/12/2023	Broad_Cove	44.166372°	64.478754°	8	2	0
2024-01-05	Sober_Island	44.832417°	-62.448700°	1	0	3
2024-01-05	Sober_Island	44.832417°	-62.448700°	2	6	4
2024-01-05	Sober_Island	44.832417°	-62.448700°	3	0	2
2024-01-05	Sober_Island	44.832417°	-62.448700°	4	0	2
2024-01-05	Sober_Island	44.832417°	-62.448700°	5	2	9
2024-01-05	Sober_Island	44.832417°	-62.448700°	6	1	4
2024-01-05	Sober_Island	44.832417°	-62.448700°	7	0	3
2024-01-07	Broad_Cove	44.166372°	64.478754°	1	0	5
2024-01-07	Broad_Cove	44.166372°	64.478754°	2	0	4
2024-01-07	Broad_Cove	44.166372°	64.478754°	3	0	4
2024-01-07	Broad_Cove	44.166372°	64.478754°	4	0	3
2024-01-07	Broad_Cove	44.166372°	64.478754°	5	0	5
2024-01-07	Broad_Cove	44.166372°	64.478754°	6	0	6

## Sheet: Kelp Biomass Data
Site	Depth	Date	Latitude	Longitude	Quadrat	Year	Species	num_0_25m2	biomass_kg_wbag	bag_wt	biomass_kg_wet_wt	biomass_kg_dry_wt
Bayswater	Shallow	2022-08-11	44.502744°	-64.062046°	Q2	2022	Laminaria digitata	0	0	0	0	0
Bayswater	Shallow	2022-08-11	44.502744°	-64.062046°	Q3	2022	Laminaria digitata	0	0	0	0	0
Bayswater	Shallow	2022-08-11	44.502744°	-64.062046°	Q6	2022	Laminaria digitata	0	0	0	0	0
Bayswater	Shallow	2022-08-11	44.502744°	-64.062046°	Q2	2022	Saccharina latissima	0	0	0	0	0
Bayswater	Shallow	2022-08-11	44.502744°	-64.062046°	Q3	2022	Saccharina latissima	0	0	0	0	0
Beaver Point	Shallow	2022-11-03	44.8682	-62.3995	Q1	2022	Laminaria digitata	5	0.54	0	0.54	0.371796
Beaver Point	Shallow	2022-11-03	44.8682	-62.3995	Q3	2022	Laminaria digitata	4	0.46	0	0.46	0.358804
Beaver Point	Shallow	2022-11-03	44.8682	-62.3995	Q4	2022	Laminaria digitata	0	0	0	0	0
Beaver Point	Shallow	2022-11-03	44.8682	-62.3995	Q6	2022	Laminaria digitata	2	0.23	0	0.23	0.321452
Beaver Point	Shallow	2021-09-08	44.8682	-62.3995	Q1	2021	Laminaria digitata	7	1.26	0.42	0.84	0.420516
Beaver Point	Shallow	2021-09-08	44.8682	-62.3995	Q2	2021	Laminaria digitata	3	0.86	0.42	0.44	0.355556
Beaver Point	Shallow	2021-09-08	44.8682	-62.3995	Q3	2021	Laminaria digitata	13	2.43	0.42	2.01	0.610524
Beaver Point	Shallow	2021-09-08	44.8682	-62.3995	Q4	2021	Laminaria digitata	2	0.59	0.42	0.17	0.311708
Beaver Point	Shallow	2021-09-08	44.8682	-62.3995	Q5	2021	Laminaria digitata	9	2.18	0.42	1.76	0.569924
Beaver Point	Shallow	2021-09-08	44.8682	-62.3995	Q6	2021	Laminaria digitata	5	0.58	0.42	0.16	0.310084
Beaver Point	Shallow	2021-09-08	44.8682	-62.3995	Q8	2021	Laminaria digitata	6	0.72	0.42	0.3	0.33282
Beaver Point	Deep	2022-11-03	44.8682	-62.3995	Q1	2022	Saccharina latissima	2	0.64	0.58	0.06	0.213604
Beaver Point	Deep	2022-11-03	44.8682	-62.3995	Q2	2022	Saccharina latissima	2	0.72	0.63	0.09	0.217906
Beaver Point	Deep	2022-11-03	44.8682	-62.3995	Q3	2022	Saccharina latissima	0	0	0	0	0
Beaver Point	Deep	2022-11-03	44.8682	-62.3995	Q4	2022	Saccharina latissima	0	0	0	0	0
Beaver Point	Deep	2022-11-03	44.8682	-62.3995	Q5	2022	Saccharina latissima	2	0.05	0	0.05	0.21217
Beaver Point	Deep	2022-11-03	44.8682	-62.3995	Q6	2022	Saccharina latissima	3	0.76	0.63	0.13	0.223642
Beaver Point	Shallow	2022-11-03	44.8682	-62.3995	Q1	2022	Saccharina latissima	1	0.01	0	0.01	0.206434
Beaver Point	Shallow	2022-11-03	44.8682	-62.3995	Q3	2022	Saccharina latissima	0	0	0	0	0
Beaver Point	Shallow	2022-11-03	44.8682	-62.3995	Q4	2022	Saccharina latissima	0	0	0	0	0
Beaver Point	Shallow	2022-11-03	44.8682	-62.3995	Q5	2022	Saccharina latissima	0	0	0	0	0
Beaver Point	Shallow	2022-11-03	44.8682	-62.3995	Q6	2022	Saccharina latissima	1	0.05	0	0.05	0.21217
Beaver Point	Deep	2021-09-08	44.8682	-62.3995	Q1	2021	Saccharina latissima	3	1.36	0.41	0.95	0.34123
Beaver Point	Deep	2021-09-08	44.8682	-62.3995	Q2	2021	Saccharina latissima	8	1.72	0.41	1.31	0.392854
Beaver Point	Deep	2021-09-08	44.8682	-62.3995	Q3	2021	Saccharina latissima	2	0.79	0.41	0.38	0.259492
Beaver Point	Deep	2021-09-08	44.8682	-62.3995	Q4	2021	Saccharina latissima	8	1.58	0.41	1.17	0.372778
Beaver Point	Deep	2021-09-08	44.8682	-62.3995	Q5	2021	Saccharina latissima	5	1.74	0.41	1.33	0.395722
Beaver Point	Deep	2021-09-08	44.8682	-62.3995	Q6	2021	Saccharina latissima	4	2.11	0.41	1.7	0.44878
Beaver Point	Deep	2021-09-08	44.8682	-62.3995	Q7	2021	Saccharina latissima	5	1.99	0.41	1.58	0.431572
Beaver Point	Shallow	2021-09-08	44.8682	-62.3995	Q1	2021	Saccharina latissima	1	0.46	0.42	0.04	0.210736
Beaver Point	Shallow	2021-09-08	44.8682	-62.3995	Q2	2021	Saccharina latissima	3	0.78	0.42	0.36	0.256624
Beaver Point	Shallow	2021-09-08	44.8682	-62.3995	Q3	2021	Saccharina latissima	1	0.62	0.42	0.2	0.23368
Beaver Point	Shallow	2021-09-08	44.8682	-62.3995	Q4	2021	Saccharina latissima	5	0.5	0.42	0.08	0.216472
Beaver Point	Shallow	2021-09-08	44.8682	-62.3995	Q5	2021	Saccharina latissima	8	0.62	0.42	0.2	0.23368
Beaver Point	Shallow	2021-09-08	44.8682	-62.3995	Q6	2021	Saccharina latissima	1	0.43	0.42	0.01	0.206434
Beaver Point	Shallow	2021-09-08	44.8682	-62.3995	Q7	2021	Saccharina latissima	2	0.43	0.42	0.01	0.206434
Beaver Point	Shallow	2021-09-08	44.8682	-62.3995	Q8	2021	Saccharina latissima	9	0.5	0.42	0.08	0.216472
Birchy Head	Shallow	2022-08-11	44.5687	-64.0356	Q1	2022	Laminaria digitata	0	0	0	0	0
Birchy Head	Shallow	2022-08-11	44.5687	-64.0356	Q2	2022	Laminaria digitata	0	0	0	0	0
Birchy Head	Shallow	2022-08-11	44.5687	-64.0356	Q3	2022	Laminaria digitata	0	0	0	0	0
Birchy Head	Shallow	2022-08-11	44.5687	-64.0356	Q4	2022	Laminaria digitata	0	0	0	0	0
Birchy Head	Shallow	2022-08-11	44.5687	-64.0356	Q5	2022	Laminaria digitata	0	0	0	0	0
Birchy Head	Shallow	2022-08-11	44.5687	-64.0356	Q6	2022	Laminaria digitata	0	0	0	0	0
Birchy Head	Shallow	2022-08-11	44.5687	-64.0356	Q1	2022	Saccharina latissima	0	0	0	0	0
Birchy Head	Shallow	2022-08-11	44.5687	-64.0356	Q2	2022	Saccharina latissima	0	0	0	0	0
Birchy Head	Shallow	2022-08-11	44.5687	-64.0356	Q3	2022	Saccharina latissima	0	0	0	0	0
Birchy Head	Shallow	2022-08-11	44.5687	-64.0356	Q4	2022	Saccharina latissima	0	0	0	0	0
Birchy Head	Shallow	2022-08-11	44.5687	-64.0356	Q5	2022	Saccharina latissima	0	0	0	0	0
Birchy Head	Shallow	2022-08-11	44.5687	-64.0356	Q6	2022	Saccharina latissima	0	0	0	0	0
Black Is	Deep	2022-08-24	45.2832	-60.964	Q1	2022	Laminaria digitata	1	0.01	0	0.01	0.285724
Black Is	Deep	2022-08-24	45.2832	-60.964	Q2	2022	Laminaria digitata	2	0.01	0	0.01	0.285724
Black Is	Deep	2022-08-24	45.2832	-60.964	Q3	2022	Laminaria digitata	1	1.69	0.59	1.1	0.46274
Black Is	Shallow	2022-08-24	45.2832	-60.964	Q2	2022	Laminaria digitata	13	1.14	0	1.14	0.469236
Black Is	Shallow	2022-08-24	45.2832	-60.964	Q4	2022	Laminaria digitata	4	2.7	0	2.7	0.72258
Black Is	Shallow	2022-08-24	45.2832	-60.964	Q5	2022	Laminaria digitata	1	0.01	0	0.01	0.285724
Black Is	Shallow	2022-08-24	45.2832	-60.964	Q6	2022	Laminaria digitata	2	0.01	0	0.01	0.285724
Black Is	Deep	2022-08-24	45.2832	-60.964	Q1	2022	Saccharina latissima	1	0.67	0.59	0.08	0.216472
Black Is	Deep	2022-08-24	45.2832	-60.964	Q4	2022	Saccharina latissima	2	0.8	0.59	0.21	0.235114
Black Is	Shallow	2022-08-24	45.2832	-60.964	Q1	2022	Saccharina latissima	2	1	0	1	0.3484
Black Is	Shallow	2022-08-24	45.2832	-60.964	Q2	2022	Saccharina latissima	9	2.24	0	2.24	0.526216
Chain Rocks	Deep	2021-08-11	44.6987	-62.8067	Q1	2021	Laminaria digitata	1	1.08	0.45	0.63	0.386412
Chain Rocks	Deep	2021-08-11	44.6987	-62.8067	Q2	2021	Laminaria digitata	3	0.95	0.45	0.5	0.3653
Chain Rocks	Deep	2021-08-11	44.6987	-62.8067	Q3	2021	Laminaria digitata	1	0.46	0.45	0.01	0.285724
Chain Rocks	Deep	2021-08-11	44.6987	-62.8067	Q4	2021	Laminaria digitata	2	1.05	0.45	0.6	0.38154
Chain Rocks	Deep	2021-08-11	44.6987	-62.8067	Q8	2021	Laminaria digitata	1	0.46	0.45	0.01	0.285724
Chain Rocks	Shallow	2021-08-11	44.6987	-62.8067	Q1	2021	Laminaria digitata	19	6.62	0.42	6.2	1.29098
Chain Rocks	Shallow	2021-08-11	44.6987	-62.8067	Q2	2021	Laminaria digitata	28	11.21	0.42	10.79	2.0364
Chain Rocks	Shallow	2021-08-11	44.6987	-62.8067	Q3	2021	Laminaria digitata	1	0.43	0.42	0.01	0.285724
Chain Rocks	Shallow	2021-08-11	44.6987	-62.8067	Q4	2021	Laminaria digitata	5	4.2	0.42	3.78	0.897972
Chain Rocks	Shallow	2021-08-11	44.6987	-62.8067	Q5	2021	Laminaria digitata	16	13.15	0.58	12.57	2.32547
Chain Rocks	Shallow	2021-08-11	44.6987	-62.8067	Q7	2021	Laminaria digitata	13	11.26	0.42	10.84	2.04452
Chain Rocks	Deep	2022-08-08	44.6987	-62.8067	Q1	2022	Laminaria digitata	0	0	0	0	0
Chain Rocks	Deep	2022-08-08	44.6987	-62.8067	Q2	2022	Laminaria digitata	0	0	0	0	0
Chain Rocks	Deep	2022-08-08	44.6987	-62.8067	Q3	2022	Laminaria digitata	0	0	0	0	0
Chain Rocks	Deep	2022-08-08	44.6987	-62.8067	Q4	2022	Laminaria digitata	1	0.01	0	0.01	0.285724
Chain Rocks	Deep	2022-08-08	44.6987	-62.8067	Q5	2022	Laminaria digitata	2	0.07	0	0.07	0.295468
Chain Rocks	Deep	2022-08-08	44.6987	-62.8067	Q6	2022	Laminaria digitata	2	0.01	0	0.01	0.285724
Chain Rocks	Shallow	2022-08-08	44.6987	-62.8067	Q1	2022	Laminaria digitata	2	1.32	0	1.32	0.498468
Chain Rocks	Shallow	2022-08-08	44.6987	-62.8067	Q2	2022	Laminaria digitata	8	5.4	0	5.4	1.16106
Chain Rocks	Shallow	2022-08-08	44.6987	-62.8067	Q3	2022	Laminaria digitata	2	1.15	0	1.15	0.47086
Chain Rocks	Shallow	2022-08-08	44.6987	-62.8067	Q4	2022	Laminaria digitata	0	0	0	0	0
Chain Rocks	Shallow	2022-08-08	44.6987	-62.8067	Q5	2022	Laminaria digitata	7	5.64	0	5.64	1.20004
Chain Rocks	Shallow	2022-08-08	44.6987	-62.8067	Q6	2022	Laminaria digitata	1	1.01	0	1.01	0.448124
Chain Rocks	Deep	2021-08-11	44.6987	-62.8067	Q2	2021	Saccharina latissima	11	1.91	0.45	1.46	0.414364
Chain Rocks	Deep	2021-08-11	44.6987	-62.8067	Q4	2021	Saccharina latissima	5	1.08	0.45	0.63	0.295342
Chain Rocks	Deep	2021-08-11	44.6987	-62.8067	Q6	2021	Saccharina latissima	9	0.61	0.45	0.16	0.227944
Chain Rocks	Deep	2021-08-11	44.6987	-62.8067	Q7	2021	Saccharina latissima	1	0.46	0.45	0.01	0.206434
Chain Rocks	Deep	2021-08-11	44.6987	-62.8067	Q8	2021	Saccharina latissima	3	0.77	0.45	0.32	0.250888
Chain Rocks	Shallow	2021-08-11	44.6987	-62.8067	Q1	2021	Saccharina latissima	1	0.46	0.42	0.04	0.210736
Chain Rocks	Deep	2022-08-08	44.6987	-62.8067	Q1	2022	Saccharina latissima	5	0.06	0	0.06	0.213604
Chain Rocks	Deep	2022-08-08	44.6987	-62.8067	Q2	2022	Saccharina latissima	3	0.01	0	0.01	0.206434
Chain Rocks	Deep	2022-08-08	44.6987	-62.8067	Q3	2022	Saccharina latissima	1	0.01	0	0.01	0.206434
Chain Rocks	Deep	2022-08-08	44.6987	-62.8067	Q4	2022	Saccharina latissima	1	1	0	1	0.3484
Chain Rocks	Deep	2022-08-08	44.6987	-62.8067	Q5	2022	Saccharina latissima	0	0	0	0	0
Chain Rocks	Deep	2022-08-08	44.6987	-62.8067	Q6	2022	Saccharina latissima	0	0	0	0	0
Chain Rocks	Shallow	2022-08-08	44.6987	-62.8067	Q1	2022	Saccharina latissima	0	0	0	0	0
Chain Rocks	Shallow	2022-08-08	44.6987	-62.8067	Q2	2022	Saccharina latissima	0	0	0	0	0
Chain Rocks	Shallow	2022-08-08	44.6987	-62.8067	Q3	2022	Saccharina latissima	0	0	0	0	0
Chain Rocks	Shallow	2022-08-08	44.6987	-62.8067	Q4	2022	Saccharina latissima	0	0	0	0	0
Chain Rocks	Shallow	2022-08-08	44.6987	-62.8067	Q5	2022	Saccharina latissima	0	0	0	0	0
Chain Rocks	Shallow	2022-08-08	44.6987	-62.8067	Q6	2022	Saccharina latissima	0	0	0	0	0
Charlotte Is	Shallow	2022-08-24	45.3129	-60.9688	Q5	2022	Laminaria digitata	4	0.76	0.7	0.06	0.293844
Charlotte Is	Deep	2022-08-24	45.3129	-60.9688	Q1	2022	Saccharina latissima	1	1.07	0.66	0.41	0.263794
Charlotte Is	Deep	2022-08-24	45.3129	-60.9688	Q2	2022	Saccharina latissima	2	1.33	0.66	0.67	0.301078
Charlotte Is	Deep	2022-08-24	45.3129	-60.9688	Q3	2022	Saccharina latissima	3	0.75	0.66	0.09	0.217906
Charlotte Is	Deep	2022-08-24	45.3129	-60.9688	Q4	2022	Saccharina latissima	3	1.96	0.66	1.3	0.39142
Charlotte Is	Deep	2022-08-24	45.3129	-60.9688	Q5	2022	Saccharina latissima	3	1.9	0.66	1.24	0.382816
Charlotte Is	Deep	2022-08-24	45.3129	-60.9688	Q6	2022	Saccharina latissima	4	3.23	0.66	2.57	0.573538
Charlotte Is	Shallow	2022-08-24	45.3129	-60.9688	Q2	2022	Saccharina latissima	3	1.05	0.7	0.35	0.25519
Charlotte Is	Shallow	2022-08-24	45.3129	-60.9688	Q3	2022	Saccharina latissima	3	0.01		0.01	0.206434
Charlotte Is	Shallow	2022-08-24	45.3129	-60.9688	Q4	2022	Saccharina latissima	7	0.01		0.01	0.206434
Charlotte Is	Shallow	2022-08-24	45.3129	-60.9688	Q5	2022	Saccharina latissima	5	0.8	0.7	0.1	0.21934
Cranberry Cove	Shallow	2022-10-07	45.3129	-60.9688	Q1	2022	Laminaria digitata	1			1.47	0.522828
Cranberry Cove	Shallow	2022-10-07	45.3129	-60.9688	Q1	2022	Saccharina latissima	1			0.07	0.215038
Crystal Crescent	Deep	2021-08-31	44.4555	-63.6161	Q2	2021	Laminaria digitata	1	1.15	0.64	0.51	0.366924
Crystal Crescent	Deep	2021-08-31	44.4555	-63.6161	Q3	2021	Laminaria digitata	3	3.53	0.64	2.89	0.753436
Crystal Crescent	Deep	2021-08-31	44.4555	-63.6161	Q4	2021	Laminaria digitata	6	5.12	0.64	4.48	1.01165
Crystal Crescent	Deep	2021-08-31	44.4555	-63.6161	Q5	2021	Laminaria digitata	4	3.96	0.64	3.32	0.823268
Crystal Crescent	Deep	2021-08-31	44.4555	-63.6161	Q6	2021	Laminaria digitata	10	5.35	0.64	4.71	1.049
Crystal Crescent	Deep	2021-08-31	44.4555	-63.6161	Q7	2021	Laminaria digitata	6	5.8	0.64	5.16	1.12208
Crystal Crescent	Deep	2021-08-31	44.4555	-63.6161	Q8	2021	Laminaria digitata	2	3.35	0.64	2.71	0.724204
Crystal Crescent	Shallow	2021-08-31	44.4555	-63.6161	Q1	2021	Laminaria digitata	7	4.65	0.38	4.27	0.977548
Crystal Crescent	Shallow	2021-08-31	44.4555	-63.6161	Q2	2021	Laminaria digitata	3	1.62	0.38	1.24	0.485476
Crystal Crescent	Shallow	2021-08-31	44.4555	-63.6161	Q3	2021	Laminaria digitata	8	1.31	0.38	0.93	0.435132
Crystal Crescent	Shallow	2021-08-31	44.4555	-63.6161	Q4	2021	Laminaria digitata	6	3.47	0.38	3.09	0.785916
Crystal Crescent	Shallow	2021-08-31	44.4555	-63.6161	Q5	2021	Laminaria digitata	11	4.11	0.38	3.73	0.889852
Crystal Crescent	Shallow	2021-08-31	44.4555	-63.6161	Q6	2021	Laminaria digitata	6	2.62	0.38	2.24	0.647876
Crystal Crescent	Shallow	2021-08-31	44.4555	-63.6161	Q7	2021	Laminaria digitata	5	3.07	0.38	2.69	0.720956
Crystal Crescent	Shallow	2021-08-31	44.4555	-63.6161	Q8	2021	Laminaria digitata	2	0.74	0.38	0.36	0.342564
Crystal Crescent	Deep	2022-09-13	44.4555	-63.6161	Q1	2022	Laminaria digitata	6	1.99	0.6	1.39	0.509836
Crystal Crescent	Deep	2022-09-13	44.4555	-63.6161	Q2	2022	Laminaria digitata	3	2.04	0.6	1.44	0.517956
Crystal Crescent	Deep	2022-09-13	44.4555	-63.6161	Q3	2022	Laminaria digitata	2	1.23	0.6	0.63	0.386412
Crystal Crescent	Deep	2022-09-13	44.4555	-63.6161	Q4	2022	Laminaria digitata	7	5.76	0.6	5.16	1.12208
Crystal Crescent	Deep	2022-09-13	44.4555	-63.6161	Q5	2022	Laminaria digitata	4	2.86	0.6	2.26	0.651124
Crystal Crescent	Deep	2022-09-13	44.4555	-63.6161	Q6	2022	Laminaria digitata	0	0	0	0	0
Crystal Crescent	Shallow	2022-09-13	44.4555	-63.6161	Q1	2022	Laminaria digitata	10	5.31	0.61	4.7	1.04738
Crystal Crescent	Shallow	2022-09-13	44.4555	-63.6161	Q2	2022	Laminaria digitata	9	1.99	0.61	1.38	0.508212
Crystal Crescent	Shallow	2022-09-13	44.4555	-63.6161	Q3	2022	Laminaria digitata	9	2.29	0.61	1.68	0.556932
Crystal Crescent	Shallow	2022-09-13	44.4555	-63.6161	Q4	2022	Laminaria digitata	8	4.5	0.61	3.89	0.915836
Crystal Crescent	Shallow	2022-09-13	44.4555	-63.6161	Q5	2022	Laminaria digitata	3	0.71	0.61	0.1	0.30034
Crystal Crescent	Shallow	2022-09-13	44.4555	-63.6161	Q6	2022	Laminaria digitata	0	0	0	0	0
Crystal Crescent	Shallow	2021-08-31	44.4555	-63.6161	Q2	2021	Saccharina latissima	19	0.51	0.38	0.13	0.223642
Crystal Crescent	Shallow	2021-08-31	44.4555	-63.6161	Q3	2021	Saccharina latissima	3	0.39	0.38	0.01	0.206434
Crystal Crescent	Deep	2022-09-13	44.4555	-63.6161	Q6	2022	Saccharina latissima	0	0	0	0	0
Crystal Crescent	Shallow	2022-09-13	44.4555	-63.6161	Q6	2022	Saccharina latissima	0	0	0	0	0
Gill Cove	Deep	2021-09-01	44.4852	-63.5344	Q5	2021	Laminaria digitata	1	0.5	0.42	0.08	0.297092
Gill Cove	Deep	2021-09-01	44.4852	-63.5344	Q6	2021	Laminaria digitata	1	0.43	0.42	0.01	0.285724
Gill Cove	Shallow	2021-09-01	44.4852	-63.5344	Q1	2021	Laminaria digitata	2	0.61	0.47	0.14	0.306836
Gill Cove	Shallow	2021-09-01	44.4852	-63.5344	Q3	2021	Laminaria digitata	1	0.56	0.47	0.09	0.298716
Gill Cove	Shallow	2021-09-01	44.4852	-63.5344	Q4	2021	Laminaria digitata	1	0.48	0.47	0.01	0.285724
Gill Cove	Shallow	2021-09-01	44.4852	-63.5344	Q5	2021	Laminaria digitata	1	0.58	0.47	0.11	0.301964
Gill Cove	Shallow	2021-09-01	44.4852	-63.5344	Q6	2021	Laminaria digitata	4	1.61	0.47	1.14	0.469236
Gill Cove	Shallow	2021-09-01	44.4852	-63.5344	Q7	2021	Laminaria digitata	3	0.48	0.47	0.01	0.285724
Gill Cove	Deep	2022-09-13	44.4852	-63.5344	Q1	2022	Laminaria digitata	0	0	0	0	0
Gill Cove	Deep	2022-09-13	44.4852	-63.5344	Q2	2022	Laminaria digitata	0	0	0	0	0
Gill Cove	Deep	2022-09-13	44.4852	-63.5344	Q3	2022	Laminaria digitata	0	0	0	0	0
Gill Cove	Deep	2022-09-13	44.4852	-63.5344	Q4	2022	Laminaria digitata	0	0	0	0	0
Gill Cove	Deep	2022-09-13	44.4852	-63.5344	Q5	2022	Laminaria digitata	0	0	0	0	0
Gill Cove	Shallow	2022-09-13	44.4852	-63.5344	Q1	2022	Laminaria digitata	0	0	0	0	0
Gill Cove	Shallow	2022-09-13	44.4852	-63.5344	Q2	2022	Laminaria digitata	0	0	0	0	0
Gill Cove	Shallow	2022-09-13	44.4852	-63.5344	Q3	2022	Laminaria digitata	1	0.01	0	0.01	0.285724
Gill Cove	Shallow	2022-09-13	44.4852	-63.5344	Q4	2022	Laminaria digitata	0	0	0	0	0
Gill Cove	Shallow	2022-09-13	44.4852	-63.5344	Q5	2022	Laminaria digitata	0	0	0	0	0
Gill Cove	Shallow	2022-09-13	44.4852	-63.5344	Q6	2022	Laminaria digitata	3	0.97	0.44	0.53	0.370172
Gill Cove	Deep	2021-09-01	44.4852	-63.5344	Q1	2021	Saccharina latissima	9	0.55	0.42	0.13	0.223642
Gill Cove	Deep	2021-09-01	44.4852	-63.5344	Q4	2021	Saccharina latissima	5	0.69	0.42	0.27	0.243718
Gill Cove	Deep	2021-09-01	44.4852	-63.5344	Q5	2021	Saccharina latissima	5	0.59	0.42	0.17	0.229378
Gill Cove	Deep	2021-09-01	44.4852	-63.5344	Q6	2021	Saccharina latissima	6	0.55	0.42	0.13	0.223642
Gill Cove	Deep	2021-09-01	44.4852	-63.5344	Q7	2021	Saccharina latissima	9	0.65	0.42	0.23	0.237982
Gill Cove	Deep	2021-09-01	44.4852	-63.5344	Q8	2021	Saccharina latissima	6	0.44	0.42	0.02	0.207868
Gill Cove	Shallow	2021-09-01	44.4852	-63.5344	Q1	2021	Saccharina latissima	6	0.63	0.47	0.16	0.227944
Gill Cove	Shallow	2021-09-01	44.4852	-63.5344	Q2	2021	Saccharina latissima	3	0.54	0.47	0.07	0.215038
Gill Cove	Shallow	2021-09-01	44.4852	-63.5344	Q3	2021	Saccharina latissima	4	0.48	0.47	0.01	0.206434
Gill Cove	Shallow	2021-09-01	44.4852	-63.5344	Q5	2021	Saccharina latissima	2	0.48	0.47	0.01	0.206434
Gill Cove	Shallow	2021-09-01	44.4852	-63.5344	Q6	2021	Saccharina latissima	12	1.6	0.47	1.13	0.367042
Gill Cove	Shallow	2021-09-01	44.4852	-63.5344	Q7	2021	Saccharina latissima	3	0.49	0.47	0.02	0.207868
Gill Cove	Shallow	2021-09-01	44.4852	-63.5344	Q8	2021	Saccharina latissima	1	0.48	0.47	0.01	0.206434
Gill Cove	Deep	2022-09-13	44.4852	-63.5344	Q1	2022	Saccharina latissima	0	0	0	0	0
Gill Cove	Deep	2022-09-13	44.4852	-63.5344	Q2	2022	Saccharina latissima	0	0	0	0	0
Gill Cove	Deep	2022-09-13	44.4852	-63.5344	Q3	2022	Saccharina latissima	0	0	0	0	0
Gill Cove	Deep	2022-09-13	44.4852	-63.5344	Q4	2022	Saccharina latissima	0	0	0	0	0
Gill Cove	Deep	2022-09-13	44.4852	-63.5344	Q5	2022	Saccharina latissima	0	0	0	0	0
Gill Cove	Shallow	2022-09-13	44.4852	-63.5344	Q1	2022	Saccharina latissima	0	0	0	0	0
Gill Cove	Shallow	2022-09-13	44.4852	-63.5344	Q2	2022	Saccharina latissima	0	0	0	0	0
Gill Cove	Shallow	2022-09-13	44.4852	-63.5344	Q4	2022	Saccharina latissima	0	0	0	0	0
Gill Cove	Shallow	2022-09-13	44.4852	-63.5344	Q5	2022	Saccharina latissima	0	0	0	0	0
Gill Cove	Shallow	2022-09-13	44.4852	-63.5344	Q6	2022	Saccharina latissima	1	0.01	0	0.01	0.206434
Key Island	Deep	2021-08-12	44.6989	-62.8204	Q1	2021	Laminaria digitata	1	0.15	0	0.15	0.30846
Key Island	Deep	2021-08-12	44.6989	-62.8204	Q3	2021	Laminaria digitata	2	0.49	0	0.49	0.363676
Key Island	Deep	2021-08-12	44.6989	-62.8204	Q7	2021	Laminaria digitata	4	0.12	0	0.12	0.303588
Key Island	Shallow	2021-08-12	44.6989	-62.8204	Q1	2021	Laminaria digitata	3	0.19	0	0.19	0.314956
Key Island	Shallow	2021-08-12	44.6989	-62.8204	Q6	2021	Laminaria digitata	10	0.69	0	0.69	0.396156
Key Island	Shallow	2021-08-12	44.6989	-62.8204	Q7	2021	Laminaria digitata	1	0.18	0	0.18	0.313332
Key Island	Shallow	2021-08-12	44.6989	-62.8204	Q8	2021	Laminaria digitata	6	0.43	0	0.43	0.353932
Key Island	Deep	2022-08-12	44.6989	-62.8204	Q1	2022	Laminaria digitata	0	0	0	0	0
Key Island	Deep	2022-08-12	44.6989	-62.8204	Q2	2022	Laminaria digitata	1	0.01	0	0.01	0.285724
Key Island	Deep	2022-08-12	44.6989	-62.8204	Q3	2022	Laminaria digitata	0	0	0	0	0
Key Island	Deep	2022-08-12	44.6989	-62.8204	Q4	2022	Laminaria digitata	1	0.18	0	0.18	0.313332
Key Island	Deep	2022-08-12	44.6989	-62.8204	Q5	2022	Laminaria digitata	0	0	0	0	0
Key Island	Deep	2022-08-12	44.6989	-62.8204	Q6	2022	Laminaria digitata	4	0.64	0	0.64	0.388036
Key Island	Shallow	2022-08-12	44.6989	-62.8204	Q1	2022	Laminaria digitata	0	0	0	0	0
Key Island	Shallow	2022-08-12	44.6989	-62.8204	Q2	2022	Laminaria digitata	0	0	0	0	0
Key Island	Shallow	2022-08-12	44.6989	-62.8204	Q3	2022	Laminaria digitata	0	0	0	0	0
Key Island	Shallow	2022-08-12	44.6989	-62.8204	Q4	2022	Laminaria digitata	0	0	0	0	0
Key Island	Shallow	2022-08-12	44.6989	-62.8204	Q5	2022	Laminaria digitata	0	0	0	0	0
Key Island	Shallow	2022-08-12	44.6989	-62.8204	Q6	2022	Laminaria digitata	5	5.55	0	5.55	1.18542
Key Island	Deep	2021-08-12	44.6989	-62.8204	Q1	2021	Saccharina latissima	1	0.18	0	0.18	0.230812
Key Island	Deep	2021-08-12	44.6989	-62.8204	Q3	2021	Saccharina latissima	2	0.45	0	0.45	0.26953
Key Island	Deep	2021-08-12	44.6989	-62.8204	Q4	2021	Saccharina latissima	10	0.21	0	0.21	0.235114
Key Island	Deep	2021-08-12	44.6989	-62.8204	Q5	2021	Saccharina latissima	6	0.63	0	0.63	0.295342
Key Island	Deep	2021-08-12	44.6989	-62.8204	Q6	2021	Saccharina latissima	4	0.42	0	0.42	0.265228
Key Island	Deep	2021-08-12	44.6989	-62.8204	Q8	2021	Saccharina latissima	1	0.01	0	0.01	0.206434
Key Island	Shallow	2021-08-12	44.6989	-62.8204	Q2	2021	Saccharina latissima	1	0.09	0	0.09	0.217906
Key Island	Shallow	2021-08-12	44.6989	-62.8204	Q4	2021	Saccharina latissima	4	0.08	0	0.08	0.216472
Key Island	Shallow	2021-08-12	44.6989	-62.8204	Q6	2021	Saccharina latissima	5	0.95	0	0.95	0.34123
Key Island	Shallow	2021-08-12	44.6989	-62.8204	Q7	2021	Saccharina latissima	2	0.44	0	0.44	0.268096
Key Island	Deep	2022-08-12	44.6989	-62.8204	Q1	2022	Saccharina latissima	0	0	0	0	0
Key Island	Deep	2022-08-12	44.6989	-62.8204	Q2	2022	Saccharina latissima	0	0	0	0	0
Key Island	Deep	2022-08-12	44.6989	-62.8204	Q3	2022	Saccharina latissima	0	0	0	0	0
Key Island	Deep	2022-08-12	44.6989	-62.8204	Q4	2022	Saccharina latissima	0	0	0	0	0
Key Island	Deep	2022-08-12	44.6989	-62.8204	Q5	2022	Saccharina latissima	0	0	0	0	0
Key Island	Deep	2022-08-12	44.6989	-62.8204	Q6	2022	Saccharina latissima	1	0.19	0	0.19	0.232246
Key Island	Shallow	2022-08-12	44.6989	-62.8204	Q1	2022	Saccharina latissima	0	0	0	0	0
Key Island	Shallow	2022-08-12	44.6989	-62.8204	Q2	2022	Saccharina latissima	0	0	0	0	0
Key Island	Shallow	2022-08-12	44.6989	-62.8204	Q3	2022	Saccharina latissima	0	0	0	0	0
Key Island	Shallow	2022-08-12	44.6989	-62.8204	Q4	2022	Saccharina latissima	0	0	0	0	0
Key Island	Shallow	2022-08-12	44.6989	-62.8204	Q5	2022	Saccharina latissima	0	0	0	0	0
Key Island	Shallow	2022-08-12	44.6989	-62.8204	Q6	2022	Saccharina latissima	0	0	0	0	0
Louise Hd	Deep	2022-08-24	45.2535	-61.0402	Q1	2022	Laminaria digitata	10	3.72	0	3.72	0.888228
Louise Hd	Deep	2022-08-24	45.2535	-61.0402	Q2	2022	Laminaria digitata	5	2.2	0	2.2	0.64138
Louise Hd	Deep	2022-08-24	45.2535	-61.0402	Q3	2022	Laminaria digitata	4	1.97	0	1.97	0.604028
Louise Hd	Deep	2022-08-24	45.2535	-61.0402	Q4	2022	Laminaria digitata	3	1.25	0	1.25	0.4871
Louise Hd	Deep	2022-08-24	45.2535	-61.0402	Q5	2022	Laminaria digitata	5	2.21	0	2.21	0.643004
Louise Hd	Deep	2022-08-24	45.2535	-61.0402	Q6	2022	Laminaria digitata	14	2.39	0	2.39	0.672236
Louise Hd	Shallow	2022-08-24	45.2535	-61.0402	Q1	2022	Laminaria digitata	0	0	0	0	0
Louise Hd	Shallow	2022-08-24	45.2535	-61.0402	Q2	2022	Laminaria digitata	0	0	0	0	0
Louise Hd	Shallow	2022-08-24	45.2535	-61.0402	Q3	2022	Laminaria digitata	0	0	0	0	0
Louise Hd	Shallow	2022-08-24	45.2535	-61.0402	Q4	2022	Laminaria digitata	2	1.89	0	1.89	0.591036
Louise Hd	Shallow	2022-08-24	45.2535	-61.0402	Q5	2022	Laminaria digitata	4	0.27	0	0.27	0.327948
Louise Hd	Shallow	2022-08-24	45.2535	-61.0402	Q6	2022	Laminaria digitata	8	1.02	0	1.02	0.449748
Louise Hd	Deep	2022-08-24	45.2535	-61.0402	Q1	2022	Saccharina latissima	0	0	0	0	0
Louise Hd	Deep	2022-08-24	45.2535	-61.0402	Q2	2022	Saccharina latissima	1	0.01	0	0.01	0.206434
Louise Hd	Deep	2022-08-24	45.2535	-61.0402	Q3	2022	Saccharina latissima	2	0.03	0	0.03	0.209302
Louise Hd	Deep	2022-08-24	45.2535	-61.0402	Q4	2022	Saccharina latissima	0	0	0	0	0
Louise Hd	Deep	2022-08-24	45.2535	-61.0402	Q5	2022	Saccharina latissima	3	0.12	0	0.12	0.222208
Louise Hd	Deep	2022-08-24	45.2535	-61.0402	Q6	2022	Saccharina latissima	1	0.82	0	0.82	0.322588
Louise Hd	Shallow	2022-08-24	45.2535	-61.0402	Q1	2022	Saccharina latissima	0	0	0	0	0
Louise Hd	Shallow	2022-08-24	45.2535	-61.0402	Q2	2022	Saccharina latissima	0	0	0	0	0
Louise Hd	Shallow	2022-08-24	45.2535	-61.0402	Q3	2022	Saccharina latissima	0	0	0	0	0
Louise Hd	Shallow	2022-08-24	45.2535	-61.0402	Q4	2022	Saccharina latissima	0	0	0	0	0
Louise Hd	Shallow	2022-08-24	45.2535	-61.0402	Q5	2022	Saccharina latissima	0	0	0	0	0
Louise Hd	Shallow	2022-08-24	45.2535	-61.0402	Q6	2022	Saccharina latissima	4	0.01	0	0.01	0.206434
Mill Cove B	Shallow	2022-08-11	44.5798	-64.051	Q1	2022	Laminaria digitata	0	0	0	0	0
Mill Cove B	Shallow	2022-08-11	44.5798	-64.051	Q2	2022	Laminaria digitata	0	0	0	0	0
Mill Cove B	Shallow	2022-08-11	44.5798	-64.051	Q3	2022	Laminaria digitata	0	0	0	0	0
Mill Cove B	Shallow	2022-08-11	44.5798	-64.051	Q4	2022	Laminaria digitata	0	0	0	0	0
Mill Cove B	Shallow	2022-08-11	44.5798	-64.051	Q5	2022	Laminaria digitata	0	0	0	0	0
Mill Cove B	Shallow	2022-08-11	44.5798	-64.051	Q6	2022	Laminaria digitata	0	0	0	0	0
Mill Cove B	Shallow	2022-08-11	44.5798	-64.051	Q1	2022	Saccharina latissima	1	0.05	0	0.05	0.21217
Mill Cove B	Shallow	2022-08-11	44.5798	-64.051	Q2	2022	Saccharina latissima	1	0.05	0	0.05	0.21217
Mill Cove B	Shallow	2022-08-11	44.5798	-64.051	Q3	2022	Saccharina latissima	0	0	0	0	0
Mill Cove B	Shallow	2022-08-11	44.5798	-64.051	Q4	2022	Saccharina latissima	0	0	0	0	0
Mill Cove B	Shallow	2022-08-11	44.5798	-64.051	Q5	2022	Saccharina latissima	0	0	0	0	0
Mill Cove B	Shallow	2022-08-11	44.5798	-64.051	Q6	2022	Saccharina latissima	1	0.22	0	0.22	0.236548
Paddys Head	Shallow	2022-10-07	44.526182°	-63.948453°	Q2	2022	Saccharina latissima	NA			0.1	0.21934
Sober Island	Deep	2021-08-10	44.8332	-62.4521	Q1	2021	Laminaria digitata	2	1.56	0	1.56	0.537444
Sober Island	Deep	2021-08-10	44.8332	-62.4521	Q2	2021	Laminaria digitata	7	3.39	0	3.39	0.834636
Sober Island	Deep	2021-08-10	44.8332	-62.4521	Q3	2021	Laminaria digitata	1	1.05	0	1.05	0.45462
Sober Island	Deep	2021-08-10	44.8332	-62.4521	Q4	2021	Laminaria digitata	4	3.67	0	3.67	0.880108
Sober Island	Deep	2021-08-10	44.8332	-62.4521	Q5	2021	Laminaria digitata	3	2.64	0	2.64	0.712836
Sober Island	Deep	2021-08-10	44.8332	-62.4521	Q6	2021	Laminaria digitata	4	2.08	0	2.08	0.621892
Sober Island	Deep	2021-08-10	44.8332	-62.4521	Q7	2021	Laminaria digitata	9	3.76	0	3.76	0.894724
Sober Island	Deep	2021-08-10	44.8332	-62.4521	Q8	2021	Laminaria digitata	7	3.3	0	3.3	0.82002
Sober Island	Shallow	2021-08-10	44.8332	-62.4521	Q1	2021	Laminaria digitata	11	9.92	0.43	9.49	1.82528
Sober Island	Shallow	2021-08-10	44.8332	-62.4521	Q2	2021	Laminaria digitata	6	3.02	0.43	2.59	0.704716
Sober Island	Shallow	2021-08-10	44.8332	-62.4521	Q3	2021	Laminaria digitata	5	2.78	0.43	2.35	0.66574
Sober Island	Shallow	2021-08-10	44.8332	-62.4521	Q4	2021	Laminaria digitata	3	2.6	0.43	2.17	0.636508
Sober Island	Shallow	2021-08-10	44.8332	-62.4521	Q5	2021	Laminaria digitata	3	2.3	0.43	1.87	0.587788
Sober Island	Shallow	2021-08-10	44.8332	-62.4521	Q6	2021	Laminaria digitata	10	5.45	0.43	5.02	1.09935
Sober Island	Shallow	2021-08-10	44.8332	-62.4521	Q8	2021	Laminaria digitata	5	4.26	0.43	3.83	0.906092
Sober Island	Deep	2022-09-21	44.8332	-62.4521	Q1	2022	Laminaria digitata	7	3.27	0.36	2.91	0.756684
Sober Island	Deep	2022-09-21	44.8332	-62.4521	Q2	2022	Laminaria digitata	7	1.17	0.36	0.81	0.415644
Sober Island	Deep	2022-09-21	44.8332	-62.4521	Q3	2022	Laminaria digitata	9	3.16	0.36	2.8	0.73882
Sober Island	Deep	2022-09-21	44.8332	-62.4521	Q4	2022	Laminaria digitata	3	1.34	0.36	0.98	0.443252
Sober Island	Deep	2022-09-21	44.8332	-62.4521	Q5	2022	Laminaria digitata	5	2.83	0.36	2.47	0.685228
Sober Island	Deep	2022-09-21	44.8332	-62.4521	Q6	2022	Laminaria digitata	3	2.57	0.36	2.21	0.643004
Sober Island	Shallow	2022-09-21	44.8332	-62.4521	Q1	2022	Laminaria digitata	5	2.1	0.72	1.38	0.508212
Sober Island	Shallow	2022-09-21	44.8332	-62.4521	Q2	2022	Laminaria digitata	9	6.12	0.43	5.69	1.20816
Sober Island	Shallow	2022-09-21	44.8332	-62.4521	Q3	2022	Laminaria digitata	1	1.12	0.41	0.71	0.399404
Sober Island	Shallow	2022-09-21	44.8332	-62.4521	Q4	2022	Laminaria digitata	11				0.2841
Sober Island	Shallow	2022-09-21	44.8332	-62.4521	Q5	2022	Laminaria digitata	14	7.3	0.45	6.85	1.39654
Sober Island	Shallow	2022-09-21	44.8332	-62.4521	Q6	2022	Laminaria digitata	5	2.32	0.41	1.91	0.594284
Sober Island	Deep	2021-08-10	44.8332	-62.4521	Q1	2021	Saccharina latissima	2	1.07	0	1.07	0.358438
Sober Island	Deep	2021-08-10	44.8332	-62.4521	Q4	2021	Saccharina latissima	4	1.63	0	1.63	0.438742
Sober Island	Shallow	2021-08-10	44.8332	-62.4521	Q1	2021	Saccharina latissima	2	1.1	0.43	0.67	0.301078
Sober Island	Shallow	2021-08-10	44.8332	-62.4521	Q3	2021	Saccharina latissima	1	0.44	0.43	0.01	0.206434
Sober Island	Shallow	2021-08-10	44.8332	-62.4521	Q4	2021	Saccharina latissima	1	0.44	0.43	0.01	0.206434
Sober Island	Shallow	2021-08-10	44.8332	-62.4521	Q5	2021	Saccharina latissima	2	0.44	0.43	0.01	0.206434
Sober Island	Shallow	2021-08-10	44.8332	-62.4521	Q6	2021	Saccharina latissima	8	1.56	0.43	1.13	0.367042
Sober Island	Shallow	2021-08-10	44.8332	-62.4521	Q7	2021	Saccharina latissima	20	1	0.43	0.57	0.286738
Sober Island	Deep	2022-09-21	44.8332	-62.4521	Q1	2022	Saccharina latissima	2	0.01	0	0.01	0.206434
Sober Island	Deep	2022-09-21	44.8332	-62.4521	Q3	2022	Saccharina latissima	1	0.01	0	0.01	0.206434
Sober Island	Deep	2022-09-21	44.8332	-62.4521	Q6	2022	Saccharina latissima	1	0.01	0	0.01	0.206434
Sober Island	Shallow	2022-09-21	44.8332	-62.4521	Q1	2022	Saccharina latissima	2	0.01	0	0.01	0.206434
Sober Island	Shallow	2022-09-21	44.8332	-62.4521	Q2	2022	Saccharina latissima	1	0.01	0	0.01	0.206434
Welsh Is	Deep	2022-08-24	45.3533	-60.972	Q1	2022	Laminaria digitata	1	0.05	0	0.05	0.29222
Welsh Is	Deep	2022-08-24	45.3533	-60.972	Q2	2022	Laminaria digitata	3	0.01	0	0.01	0.285724
Welsh Is	Deep	2022-08-24	45.3533	-60.972	Q4	2022	Laminaria digitata	1	0.05	0	0.05	0.29222
Welsh Is	Deep	2022-08-24	45.3533	-60.972	Q5	2022	Laminaria digitata	1	0.01	0	0.01	0.285724
Welsh Is	Deep	2022-08-24	45.3533	-60.972	Q6	2022	Laminaria digitata	1	0.01		0.01	0.285724
Welsh Is	Shallow	2022-08-24	45.3533	-60.972	Q1	2022	Laminaria digitata	4	0.2	0	0.2	0.31658
Welsh Is	Shallow	2022-08-24	45.3533	-60.972	Q4	2022	Laminaria digitata	1	0.01	0	0.01	0.285724
Welsh Is	Shallow	2022-08-24	45.3533	-60.972	Q5	2022	Laminaria digitata	11	1.84	0.62	1.22	0.482228
Welsh Is	Shallow	2022-08-24	45.3533	-60.972	Q6	2022	Laminaria digitata	2	0.1	0	0.1	0.30034
Welsh Is	Deep	2022-08-24	45.3533	-60.972	Q1	2022	Palmaria palmata		1.04	0.57	0.47
Welsh Is	Deep	2022-08-24	45.3533	-60.972	Q2	2022	Palmaria palmata		0.81	0.57	0.24
Welsh Is	Deep	2022-08-24	45.3533	-60.972	Q3	2022	Palmaria palmata		0.63	0.57	0.06
Welsh Is	Deep	2022-08-24	45.3533	-60.972	Q5	2022	Palmaria palmata		1	0.57	0.43
Welsh Is	Deep	2022-08-24	45.3533	-60.972	Q6	2022	Palmaria palmata		0.89	0.57	0.32
Welsh Is	Deep	2022-08-24	45.3533	-60.972	Q3	2022	Saccharina latissima	4	0.02	0	0.02	0.207868
Welsh Is	Deep	2022-08-24	45.3533	-60.972	Q4	2022	Saccharina latissima	2	0.01	0	0.01	0.206434
Welsh Is	Deep	2022-08-24	45.3533	-60.972	Q6	2022	Saccharina latissima	4	0.02		0.02	0.207868
Welsh Is	Shallow	2022-08-24	45.3533	-60.972	Q1	2022	Saccharina latissima	1	0.01	0	0.01	0.206434
Welsh Is	Shallow	2022-08-24	45.3533	-60.972	Q3	2022	Saccharina latissima	1	0.01	0	0.01	0.206434

## Sheet: Kelp growth data
Site	Latitude	Longitude	Species	Date_tag	Tag_number	Stipe_length_initial_cm	Blade_length_initial_cm	Blade_length_initial_cm_2	Note	Hole punch	Date_punched	Recovered	Date_recovered	Days_measured	Stipe_length_final_cm	Hole_length_final_cm	Hole_2_length_final_cm	Blade_length_final_cm	Dish_Tag_weight_g	Kelp_WW_Dish_Tag_weight_g	Kelp_WW_g	Kelp_DW_Dish_Tag_weight_g	Kelp_DW_g
Broad_Cove	44.166372°	64.478754°	Laminaria_digitata	2023-06-02	L18	45	160		Cut at 20 cm; Lost tag so not sure which one we recovered - matched it to LB2 in the raw data	Y	2023-06-02	Y	2023-07-28	56	44	38		153	153.15	261.09		170.07	16.92
Broad_Cove	44.166372°	64.478754°	Laminaria_digitata	2023-06-02	L17	38	86		Lost tag so not sure which one we recovered - matched it to LB3 in the raw data	Y	2023-06-02	Y	2023-07-28	56	37	16.5		75	562.99	628.95		576.72	13.73
Broad_Cove	44.166372°	64.478754°	Laminaria_digitata	2023-06-02	L29	12	127			Y	2023-06-02	Y	2023-07-28	56	12.5	21		88	88.66	165.72	77.06	102.71	14.05
Broad_Cove	44.166372°	64.478754°	Laminaria_digitata	2023-06-02	L20	12	114		Lost tag so not sure which one we recovered - matched it to LB5 in the raw data	Y	2023-06-02	Y	2023-07-28	56	15	18		111	164.14	236.31		176.34	12.2
Broad_Cove	44.166372°	64.478754°	Laminaria_digitata	2023-06-02	L21	21	90		Lost tag so not sure which one we recovered - matched it to LB4 in the raw data	Y	2023-06-02	Y	2023-07-28	56	23	17.5		72.5	159.25	213.56		168.53	9.28
Broad_Cove	44.166372°	64.478754°	Laminaria_digitata	2023-06-02	L22	47	122		Note 47 could be 43	Y	2023-06-02
Broad_Cove	44.166372°	64.478754°	Laminaria_digitata	2023-06-02	L23	20	140		Lost tag so not sure which one we recovered - matched it to LB6 in the raw data	Y	2023-06-02	Y	2023-07-28	56	21	19.5		128	86.23	149.44		98.52	12.29
Broad_Cove	44.166372°	64.478754°	Laminaria_digitata	2023-06-02	L31	50	166			Y	2023-06-02	Y	2023-07-28	56	50	13		61	44.96	134.08	89.12	62.84	17.88
Broad_Cove	44.166372°	64.478754°	Laminaria_digitata	2023-06-02	L30	33	65			Y	2023-06-02	Y	2023-07-28	56	35.5	15.5		66.5	154.49	191.43	36.94	162.32	7.83
Broad_Cove	44.166372°	64.478754°	Laminaria_digitata	2023-06-02	L28	38	135		Note 135 could be 155?; Lost tag so not sure which one we recovered - matched it to LB1 in the raw data	Y	2023-06-02	Y	2023-07-28	56	37.5	20		119	152.6	281.2		181.39	28.79
Broad_Cove	44.166372°	64.478754°	Saccharina_latissima	2023-06-02	S8	12	91		was written 12 but could have meant 12 cm for stipe length and the blade was measured in inches as 36"	Y	2023-06-02	Y	2023-07-28	56	12.5	26.5		76.5	793.51	812.16	18.65	796.96	3.45
Broad_Cove	44.166372°	64.478754°	Saccharina_latissima	2023-06-02	S7	7	95			Y	2023-06-02	Y	2023-07-28	56	9	24		78	88.76	108.77	20.01	92.5	3.74
Broad_Cove	44.166372°	64.478754°	Saccharina_latissima	2023-06-02	S18	13	101		Lost tag so not sure which one we recovered - matched it to SB2 in the raw data	Y	2023-06-02	Y	2023-07-28	56	16.5	24		115	565.89	590.39	24.5	570.38	4.49
Broad_Cove	44.166372°	64.478754°	Saccharina_latissima	2023-06-02	S10	19	104		Lost tag so not sure which one we recovered - matched it to SB5 in the raw data	Y	2023-06-02	Y	2023-07-28	56	22	17.5		82	88.77	98.35	9.58	90.22	1.45
Broad_Cove	44.166372°	64.478754°	Saccharina_latissima	2023-06-02	S17	17	133			Y	2023-06-02
Broad_Cove	44.166372°	64.478754°	Saccharina_latissima	2023-06-02	S3	33	93			Y	2023-06-02
Broad_Cove	44.166372°	64.478754°	Saccharina_latissima	2023-06-02	S2	22	112			Y	2023-06-02	Y	2023-07-28	56	24.5	25		99	46.03	66.96	20.93	48.76	2.73
Broad_Cove	44.166372°	64.478754°	Saccharina_latissima	2023-06-02	S20	12	104		Lost tag so not sure which one we recovered - matched it to SB1 in the raw data	Y	2023-06-02	Y	2023-07-28	56	13	20.5		78	157.2	169.5	12.3	159.1	1.9
Broad_Cove	44.166372°	64.478754°	Saccharina_latissima	2023-06-02	S4	34	117		Lost tag so not sure which one we recovered - matched it to SB4 in the raw data	Y	2023-06-02	Y	2023-07-28	56	38	21		78	169.1	208.75	39.65	176.76	7.66
Broad_Cove	44.166372°	64.478754°	Saccharina_latissima	2023-06-02	S9	38	107		Lost tag so not sure which one we recovered - matched it to SB3 in the raw data	Y	2023-06-02	Y	2023-07-28	56	40	19.5		68	87.57	114.3	26.73	92.15	4.58
Broad_Cove	44.166372°	64.478754°	Saccharina_latissima	2023-06-02	S5	10	109		This I think was entered as another S7 but matches the S5 recovered better	Y	2023-06-02	Y	2023-07-28	56	10	28.5		101	565.46	584.27	18.81	568.9	3.44
Broad_Cove	44.166372°	64.478754°	Laminaria_digitata	2023-09-28	L67	17	73		Relocated on October 24 2023 but not retrieved	Y	2023-09-28
Broad_Cove	44.166372°	64.478754°	Laminaria_digitata	2023-09-28	L84	24	55		Relocated on October 24 2023 but not retrieved	Y	2023-09-28
Broad_Cove	44.166372°	64.478754°	Laminaria_digitata	2023-09-28	L26	34	90			Y	2023-09-28
Broad_Cove	44.166372°	64.478754°	Laminaria_digitata	2023-09-28	L48	31	60			Y	2023-09-28
Broad_Cove	44.166372°	64.478754°	Laminaria_digitata	2023-09-28	L45	16	87			Y	2023-09-28
Broad_Cove	44.166372°	64.478754°	Saccharina_latissima	2023-09-28	S95	9.5	74			Y	2023-09-28
Broad_Cove	44.166372°	64.478754°	Saccharina_latissima	2023-09-28	S93	11	42			Y	2023-09-28
Broad_Cove	44.166372°	64.478754°	Saccharina_latissima	2023-09-28	S94	19	77			Y	2023-09-28
Broad_Cove	44.166372°	64.478754°	Saccharina_latissima	2023-09-28	S96	16	52			Y	2023-09-28
Broad_Cove	44.166372°	64.478754°	Saccharina_latissima	2023-09-28	S49	12	87			Y	2023-09-28
Broad_Cove	44.166372°	64.478754°	Laminaria_digitata		L61	6	32			Y	2023-08-29
Broad_Cove	44.166372°	64.478754°	Laminaria_digitata		L65	22	63			Y	2023-08-29	Y	2023-09-28	30	23	12		63	153.39	206.23	52.84	163.6	10.21
Broad_Cove	44.166372°	64.478754°	Laminaria_digitata		L73	23	47		lost tag maybe this one is what we tagged L3?	Y	2023-08-29	Y	2023-09-28	30	24	13.5		47	152.98	173.16	20.18	156.05	3.07
Broad_Cove	44.166372°	64.478754°	Laminaria_digitata		L62	25	50		lost tag maybe this one is what we tagged L7?	Y	2023-08-29	Y	2023-09-28	30	24	13		46	168.74	194.31	25.57	172.35	3.61
Broad_Cove	44.166372°	64.478754°	Laminaria_digitata		L71	25	77		lost tag maybe this one is what we tagged L4? or could be L6	Y	2023-08-29	Y	2023-09-28	30	25	13		77	156.98	188.35	31.37	162.08	5.1
Broad_Cove	44.166372°	64.478754°	Laminaria_digitata		L80	32	90		lost tag maybe this one is what we tagged L5?	Y	2023-08-29	Y	2023-09-28	30	30	13		89	158.22	212.93	54.71	167.38	9.16
Broad_Cove	44.166372°	64.478754°	Laminaria_digitata		L76	27	76		lost tag maybe this one is what we tagged L6?	Y	2023-08-29	Y	2023-09-28	30	24	11		77	161.74	187.63	25.89	165.49	3.75
Broad_Cove	44.166372°	64.478754°	Laminaria_digitata		L64	44	100			Y	2023-08-29	Y	2023-09-28	30	46	12		90	88.46	155.74	67.28	98.89	10.43
Broad_Cove	44.166372°	64.478754°	Laminaria_digitata		L74	38	61		lost tag maybe this one is what we tagged L1?	Y	2023-08-29	Y	2023-09-28	30	38	11.5		60	153.07	190.85	37.78	159.24	6.17
Broad_Cove	44.166372°	64.478754°	Laminaria_digitata		L79	22	53		lost tag maybe this one is what we tagged L2? or could be L7	Y	2023-08-29	Y	2023-09-28	30	21	13		48	566.1	569.2	3.1	571.92	5.82
Broad_Cove	44.166372°	64.478754°	Saccharina_latissima		S73	10	47			Y	2023-08-29	Y	2023-09-28	30	28	14		123	88.4	110	21.6	92.57	4.17
Broad_Cove	44.166372°	64.478754°	Saccharina_latissima		S77	7	17			Y	2023-08-29	Y	2023-09-28	30	26	13		32	565.8	577.03	11.23	567.37	1.57
Broad_Cove	44.166372°	64.478754°	Saccharina_latissima		S61	5	22			Y	2023-08-29	Y	2023-09-28	30	17	15.5		49.5	88.66	97.22	8.56	89.52	0.86
Broad_Cove	44.166372°	64.478754°	Saccharina_latissima		S71	8	42			Y	2023-08-29	Y	2023-09-28	30	25	20		62	89.64	104.12	14.48	91.37	1.73
Broad_Cove	44.166372°	64.478754°	Saccharina_latissima		S65	9	26			Y	2023-08-29
Broad_Cove	44.166372°	64.478754°	Saccharina_latissima		S75	11	128		lost tag maybe this one is what we tagged S1?	Y	2023-08-29	Y	2023-09-28	30	11	12.5		124	87.95	103.39	15.44	90.53	2.58
Broad_Cove	44.166372°	64.478754°	Saccharina_latissima		S80	37	92			Y	2023-08-29
Broad_Cove	44.166372°	64.478754°	Saccharina_latissima		S69	25	108			Y	2023-08-29
Broad_Cove	44.166372°	64.478754°	Saccharina_latissima		S62	12	64			Y	2023-08-29
Sober_Island	44.832417°	-62.448700°	Laminaria_digitata	2023-05-23	L1	10	114	124	Decided to only measure 1 blade as was taking too long	Y	2023-05-23	Y	2023-06-20	28	11	16	29.5	118	88.74	139.89	51.15	95.79	7.05
Sober_Island	44.832417°	-62.448700°	Laminaria_digitata	2023-05-23	L2	42	120			Y	2023-05-23	Y	2023-06-20	28	40	15	32	136	158.34	271.46	113.12	175.34	17
Sober_Island	44.832417°	-62.448700°	Laminaria_digitata	2023-05-23	L3	45	117			Y	2023-05-23	Y	2023-06-20	28	47	14	29.5	124	44.96	153.91	108.95	60.87	15.91
Sober_Island	44.832417°	-62.448700°	Laminaria_digitata	2023-05-23	L4	33	119			Y	2023-05-23	Y	2023-06-20	28	35	14	30	130	565.75	614.72	48.97	572.65	6.9
Sober_Island	44.832417°	-62.448700°	Laminaria_digitata	2023-05-23	L5	43	139			Y	2023-05-23	Y	2023-06-20	28	46	16.5	36	127	794.11	917.09	122.98	810.57	16.46
Sober_Island	44.832417°	-62.448700°	Laminaria_digitata	2023-05-23	L6	46	93			Y	2023-05-23	Y	2023-06-20	28	46	15	27	91.5	88.95	172.48	83.53	100.6	11.65
Sober_Island	44.832417°	-62.448700°	Laminaria_digitata	2023-05-23	L7	37	99			Y	2023-05-23	Y	2023-06-20	28	42	17.5	28	81	154.14	232.16	78.02	164.3	10.16
Sober_Island	44.832417°	-62.448700°	Laminaria_digitata	2023-05-23	L8	15	79			Y	2023-05-23	Y	2023-06-20	28	14	17	27	72	90.4	125.05	34.65	94.51	4.11
Sober_Island	44.832417°	-62.448700°	Laminaria_digitata	2023-05-23	L9	26	79		Found tag but kelp was dislodged	Y	2023-05-23	N
Sober_Island	44.832417°	-62.448700°	Laminaria_digitata	2023-05-23	L10	40	84			Y	2023-05-23	Y	2023-06-20	28	41	16	29	97	44.91	164.83	119.92	61.96	17.05
Sober_Island	44.832417°	-62.448700°	Laminaria_digitata	2023-05-23	L11	11	73			Y	2023-05-23	Y	2023-06-20	28	11	17.5	29	78	153.8	251.05	97.25	167.14	13.34
Sober_Island	44.832417°	-62.448700°	Laminaria_digitata	2023-05-23	L12	19	104			Y	2023-05-23	Y	2023-06-20	28	17	18	32	117	169.58	252.3	82.72	181	11.42
Sober_Island	44.832417°	-62.448700°	Laminaria_digitata	2023-05-23	L13	8	67			Y	2023-05-23	Y	2023-06-20	28	7	16.5		69	566.66	605.11	38.45	571.67	5.01
Sober_Island	44.832417°	-62.448700°	Laminaria_digitata	2023-05-23	L15	13	130			Y	2023-05-23	Y	2023-06-20	28	15	17	31	133	159.19	235.62	76.43	169.67	10.48
Sober_Island	44.832417°	-62.448700°	Laminaria_digitata	2023-05-23	L16	24	84			Y	2023-05-23	Y	2023-06-20	28	22	21	33	123	162.54	271.46	108.92	176.3	13.76
Sober_Island	44.832417°	-62.448700°	Saccharina_latissima	2023-05-23	S14	24	185			Y	2023-05-23	Y	2023-06-20	28	26	29.5		201	45.13	99.41	54.28	51.94	6.81
Sober_Island	44.832417°	-62.448700°	Saccharina_latissima	2023-05-23	S15	10	100.5			Y	2023-05-23	Y	2023-06-20	28	10	23		105	153.99	188.75	34.76	158.27	4.28
Sober_Island	44.832417°	-62.448700°	Saccharina_latissima	2023-05-23	S13	14	45			Y	2023-05-23	Y	2023-06-20	28	15	17		46	88.33	113.1	24.77	90.01	1.68
Sober_Island	44.832417°	-62.448700°	Saccharina_latissima	2023-05-23	S12	12	99		Did not find on June 20 2023 could have been dislodged or just not found, on May 1 2024 found the tag and the kelp was dislodged	Y	2023-05-23	N
Sober_Island	44.832417°	-62.448700°	Saccharina_latissima	2023-05-23	S11	11	73			Y	2023-05-23	Y	2023-06-20	28	15	20.5		81	88.74	107.67	18.93	90.9	2.16
Sober_Island	44.832417°	-62.448700°	Saccharina_latissima	2023-05-23	S6	23	47			Y	2023-05-23	Y	2023-06-20	28	25	19		54	89.46	114.97	25.51	91.36	1.9
Sober_Island	44.832417°	-62.448700°	Saccharina_latissima	2023-05-23	S16	22	82			Y	2023-05-23	Y	2023-06-20	28	22	24		94	565.16	607.79	42.63	569.24	4.08
Sober_Island	44.832417°	-62.448700°	Laminaria_digitata	2023-12-06	O42	36	63		Cut at 20 cm from meristem not reaching the hole	Y	2023-12-06	Y	2024-01-05	30	36	28		97	565.07	671.52	106.45	580.63	15.56
Sober_Island	44.832417°	-62.448700°	Laminaria_digitata	2023-12-06	O50	25	85		Cut at 20 cm from meristem not reaching the hole	Y	2023-12-06	Y	2024-01-05	30	29	58		94	162.13	279.46	117.33	178.14	16.01
Sober_Island	44.832417°	-62.448700°	Laminaria_digitata	2023-12-06	O26	18	76		Cut at 20 cm from meristem not reaching the hole	Y	2023-12-06	Y	2024-01-05	30	18	89		98	157.05	252.13	95.08	168.87	11.82
Sober_Island	44.832417°	-62.448700°	Laminaria_digitata	2023-12-06	O43	38	65		Cut at 20 cm from meristem not reaching the hole	Y	2023-12-06	Y	2024-01-05	30	44	67		100	567.07	650.74	83.67	578.61	11.54
Sober_Island	44.832417°	-62.448700°	Laminaria_digitata	2023-12-06	O30	41	65		Cut at 20 cm from meristem not reaching the hole	Y	2023-12-06	Y	2024-01-05	30	28	45		92	157.51	254.63	97.12	169.25	11.74
Sober_Island	44.832417°	-62.448700°	Laminaria_digitata	2023-12-06	O16	33	53		Cut at 20 cm from meristem not reaching the hole	Y	2023-12-06	Y	2024-01-05	30	34	70		100	567.65	660.46	92.81	579.5	11.85
Sober_Island	44.832417°	-62.448700°	Laminaria_digitata	2023-12-06	O8	48	70		Cut at 20 cm from meristem not reaching the hole	Y	2023-12-06	Y	2024-01-05	30	50	81		132	153.55	275.01	121.46	169.86	16.31
Sober_Island	44.832417°	-62.448700°	Laminaria_digitata	2023-12-06	O18	50	27		Cut at 20 cm from meristem not reaching the hole	Y	2023-12-06	Y	2024-01-05	30	58	48		61	282.82	376.53	93.71	294.48	11.66
Sober_Island	44.832417°	-62.448700°	Laminaria_digitata	2023-12-06	O20	16	54		Cut at 20 cm from meristem not reaching the hole	Y	2023-12-06	Y	2024-01-05	30	51	67		108	173.98	352.08	178.1	197.03	23.05
Sober_Island	44.832417°	-62.448700°	Laminaria_digitata	2023-12-06	lost tag	16	56			Y	2023-12-06
Sober_Island	44.832417°	-62.448700°	Saccharina_latissima	2023-12-06	O21	7	36			Y	2023-12-06
Sober_Island	44.832417°	-62.448700°	Saccharina_latissima	2023-12-06	O17	10	57			Y	2023-12-06
Sober_Island	44.832417°	-62.448700°	Saccharina_latissima	2023-12-06	O45	7	53		Cut at 20 cm from meristem not reaching the hole	Y	2023-12-06	Y	2024-01-05	30	10	106		121	92.15	112.21	20.06	93.63	1.48
Sober_Island	44.832417°	-62.448700°	Saccharina_latissima	2023-12-06	O13	6	44			Y	2023-12-06
Sober_Island	44.832417°	-62.448700°	Saccharina_latissima	2023-12-06	O29	7	52			Y	2023-12-06
Sober_Island	44.832417°	-62.448700°	Saccharina_latissima	2023-12-06	Y49	11	70		Cut at 20 cm from meristem not reaching the hole; note on May 1 2024 recovered Y49 not O49 so here should have said Y49 as was a SL not LD	Y	2023-12-06	Y	2024-01-05	30	20	125		141	89.01	110.27	21.26	91.37	2.36
Sober_Island	44.832417°	-62.448700°	Saccharina_latissima	2023-12-06	O37	10	53		Cut at 20 cm from meristem not reaching the hole	Y	2023-12-06	Y	2024-01-05	30	30	101		101	93.09	113.09	20	94.68	1.59
Sober_Island	44.832417°	-62.448700°	Laminaria_digitata	2023-10-27	O22	19	67			Y	2023-10-27
Sober_Island	44.832417°	-62.448700°	Laminaria_digitata	2023-10-27	O6	29	79		Cut at 20 cm from meristem not reaching the hole	Y	2023-10-27	Y	2024-01-05	70	30	65		104	566.15	703.39	137.24	584.33	18.18
Sober_Island	44.832417°	-62.448700°	Laminaria_digitata	2023-10-27	O46	7	46		hole 12? check meaning of that with Kira	Y	2023-10-27	Y	2023-12-06	40	9	23		50	169.78		34.21	174.3	4.52
Sober_Island	44.832417°	-62.448700°	Laminaria_digitata	2023-10-27	O41	28	88		hole 12? check meaning of that with Kira	Y	2023-10-27	Y	2023-12-06	40	28	23		68	45.36		108.15	61.26	15.9
Sober_Island	44.832417°	-62.448700°	Laminaria_digitata	2023-10-27	O44	23	90			Y	2023-10-27	Y	2023-12-06	40	25	27		93	45.31		85.84	57.23	11.92
Sober_Island	44.832417°	-62.448700°	Laminaria_digitata	2023-10-27	O9	44	53			Y	2023-10-27	Y	2023-12-06	40	44	21.5		51	153.57		73.17	163.06	9.49
Sober_Island	44.832417°	-62.448700°	Laminaria_digitata	2023-10-27	O23	51	72			Y	2023-10-27
Sober_Island	44.832417°	-62.448700°	Laminaria_digitata	2023-10-27	O36	19	72			Y	2023-10-27	Y	2023-12-06	40	18	23.5		77	154.07		93.82	166.74	12.67
Sober_Island	44.832417°	-62.448700°	Laminaria_digitata	2023-10-27	O7	62	45			Y	2023-10-27	Y	2023-12-06	40	62	18.5		45.5	159.4		86.52	171.81	12.41
Sober_Island	44.832417°	-62.448700°	Saccharina_latissima	2023-10-27	O48	25	51		written in inch	Y	2023-10-27	Y	2023-12-06	40	26.5	11		31	88.87		11.43	91.44	2.57
Sober_Island	44.832417°	-62.448700°	Saccharina_latissima	2023-10-27	O33	30	51		written in inch	Y	2023-10-27
Sober_Island	44.832417°	-62.448700°	Saccharina_latissima	2023-10-27	O3	8	56		written in inch	Y	2023-10-27	Y	2023-12-06	40	9.5	21.5		65	89.1		10.8	90.22	1.12
Sober_Island	44.832417°	-62.448700°	Saccharina_latissima	2023-10-27	O19	8	56		written in inch	Y	2023-10-27
Sober_Island	44.832417°	-62.448700°	Saccharina_latissima	2023-10-27	O38	30	51		written in inch	Y	2023-10-27	Y	2023-12-06	40	34	20		45	89.82		26.95	92.83	3.01
Sober_Island	44.832417°	-62.448700°	Laminaria_digitata	had a flag but added number on 17/8/2023	L25	40	127			Y	2023-08-17	Y	2023-09-22	36	40	12		108	153.91	208.35	54.44	162.53	8.62
Sober_Island	44.832417°	-62.448700°	Laminaria_digitata	had a flag but added number on 17/8/2023	L47	29	130			Y	2023-08-17		2023-09-22	36	25	11		86	153.29	208.77	55.48	162.47	9.18
Sober_Island	44.832417°	-62.448700°	Saccharina_latissima	had a flag but added number on 17/8/2023	S42	9	53			Y	2023-08-17
Sober_Island	44.832417°	-62.448700°	Saccharina_latissima	had a flag but added number on 17/8/2023	S45	20	125			Y	2023-08-17
Sober_Island	44.832417°	-62.448700°	Saccharina_latissima	had a flag but added number on 17/8/2023	L24	29	130			Y	2023-08-17	Y	2023-09-22	36	31	14		94	88.8	104.79	15.99	90.67	1.87
Sober_Island	44.832417°	-62.448700°	Laminaria_digitata		L44	9	78			Y	2023-08-17	Y	2023-09-22	36	10	14.4		81	153.84	185.17	31.33	159.08	5.24
Sober_Island	44.832417°	-62.448700°	Laminaria_digitata		L40	17	132			Y	2023-08-17	Y	2023-09-22	36	17	10		78	566.8	592.69	25.89	570.76	3.96
Sober_Island	44.832417°	-62.448700°	Laminaria_digitata		L49	23	98			Y	2023-08-17	Y	2023-09-22	36	23	15		93	162.61	218.84	56.23	172	9.39
Sober_Island	44.832417°	-62.448700°	Laminaria_digitata		L50	29	123			Y	2023-08-17	Y	2023-09-22	36	27	11		104	563.98	605.54	41.56	571.39	7.41
Sober_Island	44.832417°	-62.448700°	Laminaria_digitata		L46	46	123			Y	2023-08-17	Y	2023-09-22	36	47	13		113	44.81	100.69	55.88	54.49	9.68
Sober_Island	44.832417°	-62.448700°	Laminaria_digitata		L52	44	88			Y	2023-08-17
Sober_Island	44.832417°	-62.448700°	Laminaria_digitata		L57	10	102			Y	2023-08-17	Y	2023-09-22	36	10	13		92	169.54	209.38	39.84	175.84	6.3
Sober_Island	44.832417°	-62.448700°	Laminaria_digitata		L56	52	84			Y	2023-08-17				46
Sober_Island	44.832417°	-62.448700°	Laminaria_digitata		L77	55	71		on October 27 found tag with no kelp	Y	2023-09-22	N
Sober_Island	44.832417°	-62.448700°	Laminaria_digitata		L43	11	53			Y	2023-09-22	Y	2023-12-06	75	10	28.5		67	566.86		86.01	577.91	11.05
Sober_Island	44.832417°	-62.448700°	Laminaria_digitata		L78	38	104			Y	2023-09-22
Sober_Island	44.832417°	-62.448700°	Laminaria_digitata		L89	35	112			Y	2023-09-22	Y	2023-12-06	75	34	26		74	45.21		133.09	65.15	19.94
Sober_Island	44.832417°	-62.448700°	Laminaria_digitata		L82	33	105			Y	2023-09-22	Y	2023-12-06	75	31	22		85	44.94		128.49	63.99	19.05
Sober_Island	44.832417°	-62.448700°	Laminaria_digitata		L85	45	124			Y	2023-09-22	Y	2023-12-06	75	50	26.5		73.5	45.07		95.32	59.38	14.31
Sober_Island	44.832417°	-62.448700°	Laminaria_digitata		L83	48	79			Y	2023-09-22	Y	2023-12-06	75	49	19		48	153.89		62.06	162.66	8.77
Sober_Island	44.832417°	-62.448700°	Laminaria_digitata		L87	23	124			Y	2023-09-22	Y	2023-12-06	75	25	17.5		50	562.26		70.08	572.48	10.22
Sober_Island	44.832417°	-62.448700°	Saccharina_latissima		S56	20	110			Y	2023-08-17
Sober_Island	44.832417°	-62.448700°	Saccharina_latissima		S55	20	68			Y	2023-08-17
Sober_Island	44.832417°	-62.448700°	Saccharina_latissima		S40	25	81			Y	2023-08-17		2023-09-22	36	24	16		60	89.48	112.66	23.18	92.89	3.41
Sober_Island	44.832417°	-62.448700°	Saccharina_latissima		S52	29	59			Y	2023-08-17
Sober_Island	44.832417°	-62.448700°	Saccharina_latissima		S46	44	186			Y	2023-08-17		2023-09-22	36	46	18		180	565.62	590.69	25.07	569.85	4.23
Sober_Island	44.832417°	-62.448700°	Saccharina_latissima		S58	6	94			Y	2023-08-17
Sober_Island	44.832417°	-62.448700°	Saccharina_latissima		S47	19	163			Y	2023-08-17	Y	2023-09-22	36	22	24		119	157.9	194.05	36.15	162.75	4.85
Sober_Island	44.832417°	-62.448700°	Saccharina_latissima		S90	7	42			Y	2023-09-22	Y	2023-12-06	75	8	34		51.5	88.34		24.37	91.69	3.35
Sober_Island	44.832417°	-62.448700°	Saccharina_latissima		S84	11	66			Y	2023-09-22		2023-12-06	75	19	65		84.5	88.54		52.51	90.76	2.22

## Sheet: Kelp dislodgement data
Tag_Number	Date Tagged	Date Collected	Site	Species
L40	2023-06-20	2023-07-20	Sober_Island	L_digitata
L41	2023-06-20	2023-07-20	Sober_Island	L_digitata
L44	2023-06-20	2023-07-20	Sober_Island	L_digitata
L46	2023-06-20	2023-07-20	Sober_Island	L_digitata
L49	2023-06-20	2023-07-20	Sober_Island	L_digitata
L50	2023-06-20	2023-07-20	Sober_Island	L_digitata
L51	2023-06-20	2023-07-20	Sober_Island	L_digitata
L52	2023-06-20	2023-07-20	Sober_Island	L_digitata
L56	2023-06-20	2023-07-20	Sober_Island	L_digitata
L57	2023-06-20	2023-07-20	Sober_Island	L_digitata
L58	2023-06-20	2023-07-20	Sober_Island	L_digitata
L59	2023-06-20	2023-07-20	Sober_Island	L_digitata
L60	2023-06-20	2023-07-20	Sober_Island	L_digitata
S40	2023-06-20	2023-07-20	Sober_Island	S_latissima
S43	2023-06-20	2023-07-20	Sober_Island	S_latissima
S46	2023-06-20	2023-07-20	Sober_Island	S_latissima
S47	2023-06-20	2023-07-20	Sober_Island	S_latissima
S52	2023-06-20	2023-07-20	Sober_Island	S_latissima
S53	2023-06-20	2023-07-20	Sober_Island	S_latissima
S55	2023-06-20	2023-07-20	Sober_Island	S_latissima
S58	2023-06-20	2023-07-20	Sober_Island	S_latissima
S59	2023-06-20	2023-07-20	Sober_Island	S_latissima
S60	2023-06-20	2023-07-20	Sober_Island	S_latissima
L25	2023-06-20	2023-07-20	Sober_Island	L_digitata
L47	2023-06-20	2023-07-20	Sober_Island	L_digitata
L24	2023-06-20	2023-07-20	Sober_Island	S_latissima
L42	2023-06-20	2023-07-20	Sober_Island	L_digitata
S48	2023-06-20	2023-07-20	Sober_Island	S_latissima
S42	2023-06-20	2023-07-20	Sober_Island	S_latissima
S57	2023-06-20	2023-07-20	Sober_Island	S_latissima
S45	2023-06-20	2023-07-20	Sober_Island	S_latissima
S82	2023-06-20	2023-07-20	Sober_Island	S_latissima
L40	2023-07-20	2023-08-17	Sober_Island	L_digitata
L41	2023-07-20		Sober_Island	L_digitata
L44	2023-07-20	2023-08-17	Sober_Island	L_digitata
L46	2023-07-20	2023-08-17	Sober_Island	L_digitata
L49	2023-07-20	2023-08-17	Sober_Island	L_digitata
L50	2023-07-20	2023-08-17	Sober_Island	L_digitata
L51	2023-07-20		Sober_Island	L_digitata
L52	2023-07-20	2023-08-17	Sober_Island	L_digitata
L56	2023-07-20	2023-08-17	Sober_Island	L_digitata
L57	2023-07-20	2023-08-17	Sober_Island	L_digitata
L58	2023-07-20	2023-08-17	Sober_Island	L_digitata
L59	2023-07-20	2023-08-17	Sober_Island	L_digitata
L60	2023-07-20	2023-08-17	Sober_Island	L_digitata
S40	2023-07-20	2023-08-17	Sober_Island	S_latissima
S43	2023-07-20	2023-08-17	Sober_Island	S_latissima
S46	2023-07-20	2023-08-17	Sober_Island	S_latissima
S47	2023-07-20	2023-08-17	Sober_Island	S_latissima
S52	2023-07-20	2023-08-17	Sober_Island	S_latissima
S53	2023-07-20		Sober_Island	S_latissima
S55	2023-07-20	2023-08-17	Sober_Island	S_latissima
S56	2023-07-20	2023-08-17	Sober_Island	S_latissima
S58	2023-07-20	2023-08-17	Sober_Island	S_latissima
S59	2023-07-20		Sober_Island	S_latissima
S60	2023-07-20	2023-08-17	Sober_Island	S_latissima
S82	2023-07-20	2023-08-17	Sober_Island	S_latissima
L25	2023-07-20	2023-08-17	Sober_Island	L_digitata
L47	2023-07-20	2023-08-17	Sober_Island	L_digitata
L24	2023-07-20	2023-08-17	Sober_Island	S_latissima
L42	2023-07-20	2023-08-17	Sober_Island	L_digitata
S48	2023-07-20	2023-08-17	Sober_Island	S_latissima
S42	2023-07-20	2023-08-17	Sober_Island	S_latissima
S57	2023-07-20	2023-08-17	Sober_Island	S_latissima
S45	2023-07-20	2023-08-17	Sober_Island	S_latissima
S82	2023-08-17	2023-09-22	Sober_Island	S_latissima
S60	2023-08-17	2023-09-22	Sober_Island	S_latissima
S57	2023-08-17	2023-09-22	Sober_Island	S_latissima
S48	2023-08-17	2023-09-22	Sober_Island	S_latissima
L59	2023-08-17	2023-09-22	Sober_Island	L_digitata
S44	2023-09-22		Sober_Island	S_latissima
S22	2023-09-22	2023-10-27	Sober_Island	S_latissima
S21	2023-09-22		Sober_Island	S_latissima
S23	2023-09-22		Sober_Island	S_latissima
L59	2023-09-22	2023-10-27	Sober_Island	L_digitata
S57	2023-09-22	2023-10-27	Sober_Island	S_latissima
S60	2023-09-22	2023-10-27	Sober_Island	S_latissima
S88	2023-09-22	2023-10-27	Sober_Island	S_latissima
S86	2023-09-22	2023-10-27	Sober_Island	S_latissima
L83	2023-09-22	2023-10-27	Sober_Island	L_digitata
L85	2023-09-22	2023-10-27	Sober_Island	L_digitata
L87	2023-09-22	2023-10-27	Sober_Island	L_digitata
S60	2023-10-27	2023-12-06	Sober_Island	S_latissima
S88	2023-10-27	2023-12-06	Sober_Island	S_latissima
S86	2023-10-27	2023-12-06	Sober_Island	S_latissima
O1	2023-10-27	2023-12-06	Sober_Island	L_digitata
O12	2023-10-27	2023-12-06	Sober_Island	L_digitata
O49	2023-10-27	2023-12-06	Sober_Island	L_digitata
O2	2023-10-27	2023-12-06	Sober_Island	L_digitata
O32	2023-10-27	2023-12-06	Sober_Island	L_digitata
O24	2023-10-27	2023-12-06	Sober_Island	S_latissima
O27	2023-10-27		Sober_Island	S_latissima
O4	2023-10-27	2023-12-06	Sober_Island	S_latissima
O15	2023-10-27	2023-12-06	Sober_Island	S_latissima
O24	2023-12-06	2023-01-05	Sober_Island	S_latissima
O4	2023-12-06	2023-01-05	Sober_Island	S_latissima
O15	2023-12-06	2023-01-05	Sober_Island	S_latissima
Y36	2023-10-27	2023-12-06	Sober_Island	L_digitata
Y36	2023-12-06	2023-01-05	Sober_Island	L_digitata
no tag	2023-07-07		Broad_Cove	S_latissima
S68	2023-07-07	2023-07-28	Broad_Cove	S_latissima
S68	2023-07-28	2023-08-29	Broad_Cove	S_latissima
S68	2023-08-29	2023-09-28	Broad_Cove	S_latissima
S68	2023-09-28	2023-10-24	Broad_Cove	S_latissima
L63	2023-07-07	2023-07-28	Broad_Cove	L_digitata
L63	2023-07-28	2023-09-28	Broad_Cove	L_digitata
L63	2023-09-28	2023-10-24	Broad_Cove	L_digitata
L63	2023-10-24	2024-05-07	Broad_Cove	L_digitata
L65	2023-07-07	2023-07-28	Broad_Cove	L_digitata
L65	2023-07-28	2023-08-29	Broad_Cove	L_digitata
L74	2023-07-07	2023-07-28	Broad_Cove	L_digitata
L74	2023-08-29	2023-09-28	Broad_Cove	L_digitata
L64	2023-07-07	2023-07-28	Broad_Cove	L_digitata
L64	2023-07-28	2023-08-29	Broad_Cove	L_digitata
L73	2023-07-07	2023-07-28	Broad_Cove	L_digitata
L73	2023-07-28	2023-08-29	Broad_Cove	L_digitata
	2023-07-07	2023-07-28	Broad_Cove	L_digitata
L62	2023-07-28	2023-08-29	Broad_Cove	L_digitata
L69	2023-07-07	2023-07-28	Broad_Cove	L_digitata
L69	2023-07-28		Broad_Cove	L_digitata
L71	2023-07-07	2023-07-28	Broad_Cove	L_digitata
L71	2023-07-28	2023-08-29	Broad_Cove	L_digitata
L80	2023-07-07	2023-07-28	Broad_Cove	L_digitata
L80	2023-07-28	2023-08-29	Broad_Cove	L_digitata
S71	2023-07-07	2023-07-28	Broad_Cove	S_latissima
S71	2023-07-28	2023-08-29	Broad_Cove	S_latissima
S61	2023-07-07	2023-07-28	Broad_Cove	S_latissima
S61	2023-07-28	2023-08-29	Broad_Cove	S_latissima
S62	2023-07-07	2023-07-28	Broad_Cove	S_latissima
S62	2023-07-28	2023-08-29	Broad_Cove	S_latissima
S64	2023-07-07	2023-07-28	Broad_Cove	S_latissima
S64	2023-07-28	2023-08-29	Broad_Cove	S_latissima
L66	2023-07-07	2023-07-28	Broad_Cove	L_digitata
L66	2023-07-28		Broad_Cove	L_digitata
L79	2023-07-07	2023-07-28	Broad_Cove	L_digitata
L79	2023-07-28	2023-08-29	Broad_Cove	L_digitata
L76	2023-07-07	2023-07-28	Broad_Cove	L_digitata
L76	2023-07-28	2023-08-29	Broad_Cove	L_digitata
O42	2023-07-07	2023-07-28	Broad_Cove	S_latissima
O42	2023-07-28	2023-08-29	Broad_Cove	S_latissima
L75	2023-07-07	2023-07-28	Broad_Cove	S_latissima
L75	2023-07-28		Broad_Cove	S_latissima
L68	2023-07-07	2023-07-28	Broad_Cove	S_latissima
L68	2023-07-28	2023-08-29	Broad_Cove	S_latissima
L45	2023-07-07	2023-08-29	Broad_Cove	L_digitata
L45	2023-08-29	2023-09-28	Broad_Cove	L_digitata
L61	2023-07-07	2023-07-28	Broad_Cove	L_digitata
L61	2023-07-28	2023-08-29	Broad_Cove	L_digitata
S73	2023-07-07	2023-07-28	Broad_Cove	S_latissima
S73	2023-07-28	2023-08-29	Broad_Cove	S_latissima
S77	2023-07-07	2023-07-28	Broad_Cove	S_latissima
S77	2023-07-28	2023-08-29	Broad_Cove	S_latissima
S65	2023-07-07	2023-07-28	Broad_Cove	S_latissima
S65	2023-07-28	2023-08-29	Broad_Cove	S_latissima
S67	2023-07-07	2023-07-28	Broad_Cove	S_latissima
S67	2023-07-28	2023-08-29	Broad_Cove	S_latissima
S63	2023-07-07	2023-07-28	Broad_Cove	S_latissima
S63	2023-07-28	2023-08-29	Broad_Cove	S_latissima
L90	2023-09-28	2023-10-24	Broad_Cove	L_digitata
L55	2023-09-28		Broad_Cove	L_digitata
O39	2023-10-24		Broad_Cove	L_digitata
O14	2023-10-24		Broad_Cove	L_digitata
O40	2023-10-24		Broad_Cove	L_digitata
O25	2023-10-24	2023-12-14	Broad_Cove	L_digitata
O25	2023-12-14	2024-05-07	Broad_Cove	L_digitata
O28	2023-10-24		Broad_Cove	L_digitata

## Sheet: Sheet8
Species	Kelp_area_bioregion_km2
Saccharina latissima	1421.6
Laminaria digitata	1101.76

## Sheet: DOC Production
	Season	Species	mean_daily_season_DOC_mg_evol_per_gDW	sd_mean_daily_season_DOC_mg_evol_per_gDW	mean_daily_season_DOC_mg_evol_per_ind	sd_mean_daily_season_DOC_mg_evol_per_ind	total_season_DOC_mg_evol_per_gDW	sd_total_season_DOC_mg_evol_per_gDW	total_season_DOC_mg_evol_per_ind	sd_total_season_DOC_mg_evol_per_ind
1	Fall	L_digitata	2.10467	1.14902	16.4975	7.55131	185.211	101.113	1451.78	664.516
2	Fall	S_latissima	1.44738	1.52022	1.86941	4.61579	127.369	133.779	164.508	406.19
3	Fall	Z_marina	1.496	1.78301	0.232653	0.443311	131.648	156.905	20.4735	39.0114
4	Spring	L_digitata	0.402992	0.343563	4.07632	3.61321	37.4782	31.9513	379.098	336.029
5	Spring	S_latissima	1.88229	0.958307	8.99762	4.25814	175.053	89.1225	836.778	396.007
6	Spring	Z_marina	0.0616549	1.95097	0.109674	0.268484	5.7339	181.44	10.1997	24.969
7	Summer	L_digitata	2.02504	1.40206	12.3256	7.84298	190.354	131.794	1158.6	737.24
8	Summer	S_latissima	2.15982	0.533891	9.55619	1.45348	203.023	50.1858	898.282	136.627
9	Summer	Z_marina	3.81584	0.51718	1.1902	0.192122	358.689	48.6149	111.879	18.0595
10	Winter	L_digitata	0.317017	0.410661	2.45248	3.9845	28.5316	36.9595	220.723	358.605
11	Winter	S_latissima	1.4512	0.611049	7.04903	2.77951	130.608	54.9944	634.413	250.156
12	Winter	Z_marina	-0.724056	1.863	-0.0174605	0.219329	-65.165	167.67	-1.57145	19.7396
13	Total	L_digitata	NA	NA	NA	NA	441.574	173.149	3210.2	1107.53
14	Total	S_latissima	NA	NA	NA	NA	636.054	177.152	2533.98	634.867
15	Total	Z_marina	NA	NA	NA	NA	430.906	296.675	140.98	53.4896

## Sheet: Zostera NPP POC
Species	Season	NPP_gC_m2_d	sd_NPP_gC_m2_d	Export_gC_m2_d	sd_Export_gC_m2_d	Leaf_fall_gC_m2_d	sd_Leaf_fall_gC_m2_d
Zostera marina	Spring	0.947914	0.894141	0.228419	0.131123	0.1544	0.0759
Zostera marina	Summer	1.62562	0.871605	0.505956	1.20129	1.3607	0.3614
Zostera marina	Fall	0.41845	0.158053	0.660155	0.383259	0.9647	0.6339
Zostera marina	Winter	0.126172	0.0765108	0.106248	0.0674778	0.1525	0.0453

## Sheet: Zostera Sediment Carbon
Species	Position	mean_sediment_carbon_gC_m2	sd_sediment_carbon_gC_m2
Zostera marina	sediment in bed	7361	5578

## Sheet: POC Deposition Substrate
Species	Genus	Season	mean_percent_mud	sd_mud	mean_percent_seagrass	sd_percent_seagrass
Laminaria digitata	digitata	Fall	11.8705	4.41296	2.05598	1.04872
Laminaria digitata	digitata	Spring	10.5535	4.95363	2.68926	1.15486
Laminaria digitata	digitata	Summer	11.5227	5.27662	2.98124	0.461638
Laminaria digitata	digitata	Winter	9.44877	6.45165	2.44235	0.8883
Saccharina latissima	latissima	Fall	17.6419	8.96172	4.31488	3.41549
Saccharina latissima	latissima	Spring	16.0035	6.882	5.395	3.78674
Saccharina latissima	latissima	Summer	18.3844	7.7854	5.98337	2.63662
Saccharina latissima	latissima	Winter	16.1673	9.66744	5.88132	1.83156
Zostera marina	marina	Fall	21.2728	0.246546	16.955	19.7289
Zostera marina	marina	Spring	20.4559	7.31152	19.2757	18.3539
Zostera marina	marina	Summer	29.2956	0.90884	9.21471	4.00971
Zostera marina	marina	Winter	13.3355	8.45168	4.14456	1.22225
Laminaria digitata	digitata	Annual	10.8488	4.15021	2.54221	0.788962
Saccharina latissima	latissima	Annual	17.0493	6.43381	5.39364	2.38478
Zostera marina	marina	Annual	21.09	7.38313	12.3975	12.1673
